# Supplementary material for: Identification and validation of KLRB1-related biomarkers in rheumatoid arthritis
Source: Research Square preprint supplement (doi:10.21203/rs.3.rs-7233436/v1), 2025-08-13
Supplement: Supplementary file 1 [file 5c124491a667e2e62812d88c.xlsx]

## Sheet: Table S1
Supplementary Table1. RT-qPCR program conditions
	temperature	time
Pre-denaturation	95℃	1 min
denaturation	95℃	20 s
anneal	55℃	20 s
extend	72℃	30 s

## Sheet: Table S2
Supplementary Table2. RT-qPCR primer sequence
Primer	Sequences
ADAMDEC1 F	ACATTCCCCAATCTCACACGAA
ADAMDEC1 R	ATCCCACGCAGCATGAAGTT
CXCL13 F	TGGGGCAAACTCAAGCTTCT
CXCL13 R	CCTCCCAGGCAGCTTTTTGA
GAPDH F	ATGGGCAGCCGTTAGGAAAG
GAPDH R	AGGAAAAGCATCACCCGGAG

## Sheet: Table S3
Supplementary Table3. Total RNA concentration assay
Number	Group	Concentration	A260/A280	A260/A230
		(ng/uL)
1	NRA	275.04	1.168	0.553
2	NRA	237.44	1.106	0.32
3	NRA	481.36	1.168	0.397
4	NRA	1752.1	1.63	0.293
5	NRA	875.36	1.05	0.648
6	RA	496.36	1.435	0.785
7	RA	2893.7	1.745	1.337
8	RA	327.8	1.209	0.367
9	RA	2913.8	1.6	0.525
10	RA	303.24	1.17	0.345
