# Supplementary material for: Identification and validation of KLRB1-related biomarkers in rheumatoid arthritis
Source: Research Square preprint supplement (doi:10.21203/rs.3.rs-7233436/v1), 2025-08-13
Supplement: Supplementary file 2 [file 8f82e3339c39fc1226c55c55.docx]

**Supplementary Figure**

**FigS1.** (A) Differential expression of KLRB1 in GSE55235. (B) Sample clustering tree of GSE55235 in WGCNA network. (C) Selection of the soft-thresholding power β. The left panel showed the scale-free fit index versus soft-thresholding power β. The right panel displayed the mean connectivity versus soft-thresholding power β. The soft-thresholding power β was selected as 6 to make the fit index curve flat (R2 > 0.9). *P<0.05,**P<0.01,***P<0.001,****P<0.0001

**FigS2.** Prediction of diagnosis value of ADAMDEC1 and CXCL13 in train (GSE55235) and verify (GSE55457) datasets.
